# Supplementary material for: Immunodominant Linear B-Cell Epitopes of SARS-CoV-2 Spike, Identified by Sera from K18-hACE2 Mice Infected with the WT or Variant Viruses
Source: MDPI journal article supplement (doi:10.3390/vaccines10020251), 2022-02-07
Supplement: s1 [file s1]

**Table S1.** Peptides included in this study and the percentage of positive sera among the experimental groups.

| Peptide No. | Spike aa start-position | Peptide sequence | Spike aa end-position | Number of "positive" sera samples |                |                |
|-------------|-------------------------|------------------|-----------------------|-----------------------------------|----------------|----------------|
|             |                         |                  |                       | WT (n=15)                         | B.1.1.7 (n=17) | B.1.351 (n=22) |
| 1           | 1                       | MFVFLVLLPLVSSQC  | 15                    | 0                                 | 2              | 0              |
| 2           | 6                       | VLLPLVSSQCVNLTT  | 20                    | 0                                 | 0              | 1              |
| 3           | 11                      | VSSQCVNLTTTRTQLP | 25                    | 0                                 | 0              | 0              |
| 4           | 16                      | VNLTTTRTQLPPAYTN | 30                    | 0                                 | 1              | 1              |
| 5           | 21                      | RTQLPPAYTNSFTRG  | 35                    | 3                                 | 1              | 3              |
| 6           | 26                      | PAYTNSFTRGVYYPD  | 40                    | 5                                 | 0              | 10             |
| 7           | 31                      | SFTRGVYYPDKVFRS  | 45                    | 0                                 | 0              | 0              |
| 8           | 36                      | VYYPDKVFRSSVLHS  | 50                    | 0                                 | 0              | 0              |
| 9           | 41                      | KVFRSSVLHSTQDLF  | 55                    | 0                                 | 0              | 0              |
| 10          | 46                      | SVLHSTQDLFLPFFS  | 60                    | 0                                 | 1              | 0              |
| 11          | 51                      | TQDLFLPFFSNVTWF  | 65                    | 1                                 | 1              | 1              |
| 12          | 56                      | LPFFSNVTWFHAIHV  | 70                    | 0                                 | 2              | 1              |
| 13          | 61                      | NVTWFHAIHVSGTNG  | 75                    | 0                                 | 0              | 0              |
| 14          | 66                      | HAIHVSGTNGTKRFD  | 80                    | 0                                 | 0              | 0              |
| 15          | 71                      | SGTNGTKRFDNPVLP  | 85                    | 0                                 | 0              | 0              |
| 16          | 76                      | TKRFDNPVLPFNDGV  | 90                    | 0                                 | 0              | 0              |
| 17          | 81                      | NPVLPFNDGVYFAST  | 95                    | 0                                 | 0              | 0              |
| 18          | 86                      | FNDGVYFASTEKSNI  | 100                   | 0                                 | 0              | 0              |
| 19          | 91                      | YFASTEKSNIIRGWI  | 105                   | 0                                 | 0              | 0              |
| 20          | 96                      | EKSNIIRGWIFGTTL  | 110                   | 1                                 | 2              | 1              |
| 21          | 101                     | IRGWIFGTTLDSKTQ  | 115                   | 0                                 | 0              | 0              |
| 22          | 106                     | FGTTLDSKTQSLIV   | 120                   | 0                                 | 0              | 0              |
| 23          | 111                     | DSKTQSLIVNNATN   | 125                   | 0                                 | 0              | 0              |
| 24          | 116                     | SLIVNNATNVVIKV   | 130                   | 0                                 | 0              | 0              |
| 25          | 121                     | NNATNVVIKVCEFQF  | 135                   | 0                                 | 0              | 0              |
| 26          | 126                     | VVIKVCEFQFCNDPF  | 140                   | 7                                 | 13             | 10             |
| 27          | 131                     | CEFQFCNDPFLGVYY  | 145                   | 5                                 | 8              | 11             |
| 28          | 136                     | CNDPFLGVYYHKNNK  | 150                   | 2                                 | 0              | 11             |
| 29          | 141                     | LGVYYHKNNKSWMES  | 155                   | 1                                 | 0              | 6              |
| 30          | 146                     | HKNNKSWMESEFRVY  | 160                   | 0                                 | 0              | 0              |
| 31          | 151                     | SWMESEFRVYSSANN  | 165                   | 0                                 | 1              | 0              |
| 32          | 156                     | EFRVYSSANNCTFEY  | 170                   | 0                                 | 1              | 0              |
| 33          | 161                     | SSANNCTFEYVSQPF  | 175                   | 0                                 | 1              | 0              |
| 34          | 166                     | CTFEYVSQPFLLMDLE | 180                   | 0                                 | 1              | 0              |
| 35          | 171                     | VSQPFLLMDLEGKQGN | 185                   | 0                                 | 0              | 0              |
| 36          | 176                     | LMDLEGKQGNFKNLR  | 190                   | 0                                 | 0              | 0              |
| 37          | 181                     | GKQGNFKNLRFEVFK  | 195                   | 0                                 | 0              | 0              |
| 38          | 186                     | FKNLRFEVFKNIDGY  | 200                   | 0                                 | 0              | 0              |
| 39          | 191                     | EFVFKNIDGYFKIYS  | 205                   | 0                                 | 1              | 1              |
| 40          | 196                     | NIDGYFKIYSKHTPI  | 210                   | 0                                 | 1              | 0              |
| 41          | 201                     | FKIYSKHTPINLVRD  | 215                   | 0                                 | 1              | 0              |
| 42          | 206                     | KHTPINLVRDLPQGF  | 220                   | 0                                 | 1              | 0              |
| 43          | 211                     | NLVRDLPQGFSALEP  | 225                   | 0                                 | 1              | 0              |
| 44          | 216                     | LPQGFSALEPLVDLP  | 230                   | 0                                 | 1              | 0              |
| 45          | 221                     | SALEPLVDLPIGINI  | 235                   | 0                                 | 1              | 0              |
| 46          | 226                     | LVDLPIGINITRFQT  | 240                   | 0                                 | 1              | 0              |
| 47          | 231                     | IGINITRFQTLLALH  | 245                   | 0                                 | 0              | 0              |
| 48          | 236                     | TRFQTLLALHRSYLT  | 250                   | 0                                 | 0              | 0              |
| 49          | 241                     | LLALHRSYLTPGDSS  | 255                   | 0                                 | 1              | 0              |

|     |     |                  |     |    |    |    |
|-----|-----|------------------|-----|----|----|----|
| 50  | 246 | RSYLTPGDSSSGWTA  | 260 | 0  | 0  | 0  |
| 51  | 251 | PGDSSSGWTAGAAAY  | 265 | 0  | 1  | 0  |
| 52  | 256 | SGWTAGAAAYVGYL   | 270 | 0  | 1  | 0  |
| 53  | 261 | GAAAYVGYLQPRTF   | 275 | 0  | 1  | 0  |
| 54  | 266 | YVGYLQPRTFLLKYN  | 280 | 2  | 5  | 4  |
| 55  | 271 | QPRTFLLKYNENGTI  | 285 | 0  | 1  | 0  |
| 56  | 276 | LLKYNENGTITDAVD  | 290 | 0  | 1  | 0  |
| 57  | 281 | ENGTITDAVDCALDP  | 295 | 0  | 1  | 0  |
| 58  | 286 | TDAVDCALDPLSETK  | 300 | 0  | 0  | 0  |
| 59  | 291 | CALDPLSETKCTLKS  | 305 | 0  | 0  | 0  |
| 60  | 296 | LSETKCTLKSFTVEK  | 310 | 0  | 0  | 0  |
| 61  | 301 | CTLKSFTVEKGIYQT  | 315 | 0  | 0  | 0  |
| 62  | 306 | FTVEKGIYQTSNFRV  | 320 | 0  | 0  | 0  |
| 63  | 311 | GIYQTSNFRVQPTES  | 325 | 0  | 1  | 0  |
| 64  | 316 | SNFRVQPTESIVRFP  | 330 | 0  | 1  | 0  |
| 65  | 321 | QPTESIVRFPNITNL  | 335 | 0  | 1  | 0  |
| 66  | 326 | IVRFPNITNLCPFGE  | 340 | 0  | 1  | 0  |
| 67  | 331 | NITNLCPFGEVFNAT  | 345 | 0  | 1  | 0  |
| 68  | 336 | CPFGEVFNATRFASV  | 350 | 0  | 1  | 0  |
| 69  | 341 | VFNATRFASVYAWNR  | 355 | 0  | 1  | 0  |
| 70  | 346 | RFASVYAWNRKRISN  | 360 | 0  | 0  | 0  |
| 71  | 351 | YAWNRKRISNCVADY  | 365 | 0  | 0  | 0  |
| 72  | 356 | KRISNCVADYSVLYN  | 370 | 0  | 1  | 0  |
| 73  | 361 | CVADYSVLYNSASFS  | 375 | 0  | 0  | 0  |
| 74  | 366 | SVLYNSASFSTFKCY  | 380 | 0  | 0  | 0  |
| 75  | 371 | SASFSTFKCYGVSPT  | 385 | 4  | 7  | 5  |
| 76  | 376 | TFKCYGVSPTKLNDL  | 390 | 0  | 2  | 0  |
| 77  | 381 | GVSPTKLNDLCFTNV  | 395 | 0  | 1  | 0  |
| 78  | 386 | KLNDLCFTNVYADSF  | 400 | 0  | 1  | 0  |
| 79  | 391 | CFTNVYADSFVIRGD  | 405 | 0  | 0  | 0  |
| 80  | 396 | YADSFVIRGDEVQRQI | 410 | 0  | 0  | 0  |
| 81  | 401 | VIRGDEVQRQIAPGQT | 415 | 0  | 0  | 0  |
| 82  | 406 | EVRQIAPGQTGKIAD  | 420 | 0  | 0  | 0  |
| 83  | 411 | APGQTGKIADYNYKL  | 425 | 0  | 0  | 0  |
| 84  | 416 | GKIADYNYKLPPDDFT | 430 | 0  | 0  | 0  |
| 85  | 421 | YNYKLPPDDFTGCVIA | 435 | 0  | 1  | 0  |
| 86  | 426 | PDDFTGCVIAWNSNN  | 440 | 3  | 6  | 5  |
| 87  | 431 | GCVIAWNSNNLDSKV  | 445 | 0  | 0  | 0  |
| 88  | 436 | WNSNNLDSKVGGNYN  | 450 | 0  | 0  | 0  |
| 89  | 441 | LDSKVGGNYNLYRL   | 455 | 0  | 0  | 1  |
| 90  | 446 | GGNLYRLYRLFRKSN  | 460 | 6  | 2  | 13 |
| 91  | 451 | YLYRLFRKSNLKPFE  | 465 | 1  | 1  | 2  |
| 92  | 456 | FRKSNLKPFERDIST  | 470 | 1  | 0  | 0  |
| 93  | 461 | LKPFERDISTEIYQA  | 475 | 1  | 0  | 0  |
| 94  | 466 | RDISTEIYQAGSTPC  | 480 | 1  | 0  | 1  |
| 95  | 471 | EIYQAGSTPCNGVEG  | 485 | 1  | 0  | 1  |
| 96  | 476 | GSTPCNGVEGFNCYF  | 490 | 1  | 1  | 1  |
| 97  | 481 | NGVEGFNCYFFLQSY  | 495 | 0  | 3  | 1  |
| 98  | 486 | FNCYFFLQSYGFQPT  | 500 | 1  | 0  | 0  |
| 99  | 491 | PLQSYGFQPTNGVG   | 505 | 0  | 0  | 0  |
| 100 | 496 | GFQPTNGVGYPYRV   | 510 | 0  | 0  | 0  |
| 101 | 501 | NGVGYPYRVVLSF    | 515 | 13 | 15 | 12 |
| 102 | 506 | QPYRVVLSFELLHA   | 520 | 0  | 0  | 0  |
| 103 | 511 | VVLSFELLHAPATVC  | 525 | 0  | 0  | 0  |
| 104 | 516 | ELLHAPATVCGPKKS  | 530 | 0  | 0  | 0  |
| 105 | 521 | PATVCGPKKSTNLVK  | 535 | 0  | 0  | 0  |

|     |     |                 |     |   |   |   |
|-----|-----|-----------------|-----|---|---|---|
| 106 | 526 | GPKKSTNLVKNKCVN | 540 | 0 | 0 | 0 |
| 107 | 531 | TNLVKNKCVNFNFNG | 545 | 0 | 0 | 0 |
| 108 | 536 | NKCVNFNFNGLTGTG | 550 | 1 | 0 | 0 |
| 109 | 541 | FNFNGLTGTGVLTES | 555 | 0 | 0 | 0 |
| 110 | 546 | LTGTGVLTESNKKFL | 560 | 0 | 0 | 0 |
| 111 | 551 | VLTESNKKFLPFQQF | 565 | 0 | 0 | 2 |
| 112 | 556 | NKKFLPFQQFGRDIA | 570 | 0 | 0 | 2 |
| 113 | 561 | PFQQFGRDIADTTDA | 575 | 0 | 0 | 0 |
| 114 | 566 | GRDIADTTDAVRDPQ | 580 | 0 | 0 | 1 |
| 115 | 571 | DTTDAVRDPQTLEIL | 585 | 0 | 0 | 0 |
| 116 | 576 | VRDPQTLEILDITPC | 590 | 0 | 0 | 0 |
| 117 | 581 | TLEILDITPCSFGGV | 595 | 0 | 0 | 0 |
| 118 | 586 | DITPCSFGGVSVITP | 600 | 0 | 0 | 0 |
| 119 | 591 | SFGGVSVITPGTNTS | 605 | 0 | 0 | 0 |
| 120 | 596 | SVITPGTNTSNQVAV | 610 | 0 | 0 | 0 |
| 121 | 601 | GTNTSNQVAVLYQDV | 615 | 0 | 0 | 0 |
| 122 | 606 | NQVAVLYQDVNCTEV | 620 | 0 | 0 | 0 |
| 123 | 611 | LYQDVNCTEVPVAIH | 625 | 0 | 0 | 0 |
| 124 | 616 | NCTEVPVAIHADQLT | 630 | 0 | 0 | 1 |
| 125 | 621 | PVAIHADQLTPTWRV | 635 | 0 | 0 | 1 |
| 126 | 626 | ADQLTPTWRVYSTGS | 640 | 0 | 0 | 1 |
| 127 | 631 | PTWRVYSTGSNVFQT | 645 | 0 | 0 | 0 |
| 128 | 636 | YSTGSNVFQTRAGCL | 650 | 0 | 0 | 0 |
| 129 | 641 | NVFQTRAGCLIGAEH | 655 | 0 | 0 | 0 |
| 130 | 646 | RAGCLIGAEHVNNSY | 660 | 0 | 0 | 0 |
| 131 | 651 | IGAEHVNNSYECDIP | 665 | 0 | 0 | 0 |
| 132 | 656 | VNNSYECDIPIGAGI | 670 | 0 | 0 | 0 |
| 133 | 661 | ECDIPIGAGICASYQ | 675 | 0 | 0 | 0 |
| 134 | 666 | IGAGICASYQTQTNS | 680 | 0 | 0 | 0 |
| 135 | 671 | CASYQTQTNSPRRAR | 685 | 0 | 0 | 0 |
| 136 | 676 | TQTNSPRRARSVASQ | 690 | 0 | 0 | 0 |
| 137 | 681 | PRRARSVASQSIIAY | 695 | 0 | 0 | 0 |
| 138 | 686 | SVASQSIIAYTMSLG | 700 | 5 | 7 | 5 |
| 139 | 691 | SIIAYTMSLGAENSV | 705 | 4 | 2 | 2 |
| 140 | 696 | TMSLGAENSVAYSNN | 710 | 0 | 0 | 0 |
| 141 | 701 | AENSVAYSNNIAIP  | 715 | 0 | 0 | 0 |
| 142 | 706 | AYSNNIAIPTNFTI  | 720 | 0 | 0 | 0 |
| 143 | 711 | SIAIPTNFTISVTTE | 725 | 0 | 0 | 0 |
| 144 | 716 | TNFTISVTTEILPVS | 730 | 0 | 0 | 0 |
| 145 | 721 | SVTTEILPVSMTKTS | 735 | 0 | 0 | 0 |
| 146 | 726 | ILPVSMTKTSVDCTM | 740 | 0 | 0 | 0 |
| 147 | 731 | MTKTSVDCTMYICGD | 745 | 0 | 1 | 0 |
| 148 | 736 | VDCTMYICGDSTECS | 750 | 0 | 0 | 0 |
| 149 | 741 | YICGDSTECSNLLLQ | 755 | 0 | 0 | 0 |
| 150 | 746 | STECSNLLLQYGSFC | 760 | 0 | 0 | 0 |
| 151 | 751 | NLLLQYGSFCTQLNR | 765 | 0 | 0 | 0 |
| 152 | 756 | YGSFCTQLNRALTGI | 770 | 0 | 0 | 0 |
| 153 | 761 | TQLNRALTGIAVEQD | 775 | 0 | 0 | 0 |
| 154 | 766 | ALTGIAVEQDKNTQE | 780 | 0 | 0 | 0 |
| 155 | 771 | AVEQDKNTQEVFAQV | 785 | 0 | 0 | 0 |
| 156 | 776 | KNTQEVFAQVKQIYK | 790 | 0 | 0 | 0 |
| 157 | 781 | VFAQVKQIYKTPPIK | 795 | 0 | 1 | 0 |
| 158 | 786 | KQIYKTPPIKDFGGF | 800 | 0 | 2 | 0 |
| 159 | 791 | TPPIKDFGGFNFSQI | 805 | 0 | 1 | 0 |
| 160 | 796 | DFGGFNFSQILPDPS | 810 | 1 | 4 | 0 |
| 161 | 801 | NFSQILPDPSKPSKR | 815 | 2 | 6 | 1 |

|     |      |                  |      |   |   |   |
|-----|------|------------------|------|---|---|---|
| 162 | 806  | LPDPSKPSKRSFIED  | 820  | 0 | 2 | 0 |
| 163 | 811  | KPSKRSFIEDLLFNK  | 825  | 2 | 2 | 0 |
| 164 | 816  | SFIEDLLFNKVTLAD  | 830  | 0 | 2 | 0 |
| 165 | 821  | LLFNKVTLADAGFIK  | 835  | 0 | 0 | 0 |
| 166 | 826  | VTLADAGFIKQYGDC  | 840  | 0 | 0 | 0 |
| 167 | 831  | AGFIKQYGDCLGDIA  | 845  | 0 | 0 | 0 |
| 168 | 836  | QYGDCLGDIAARDLI  | 850  | 0 | 0 | 0 |
| 169 | 841  | LGDIAARDLICAQKF  | 855  | 0 | 0 | 0 |
| 170 | 846  | ARDLICAQKFNGLTV  | 860  | 0 | 0 | 0 |
| 171 | 851  | CAQKFNGLTVLPPLL  | 865  | 0 | 0 | 0 |
| 172 | 856  | NGLTVLPPLLTDEMI  | 870  | 0 | 0 | 0 |
| 173 | 861  | LPPLLTDEMIAQYTS  | 875  | 0 | 0 | 0 |
| 174 | 866  | TDEMIAQYTSALLAG  | 880  | 0 | 0 | 0 |
| 175 | 871  | AQYTSALLAGTITSG  | 885  | 0 | 0 | 0 |
| 176 | 876  | ALLAGTITSGWTFGA  | 890  | 0 | 0 | 0 |
| 177 | 881  | TITSGWTFGAGALQ   | 895  | 0 | 0 | 0 |
| 178 | 886  | WTFGAGALQIPFAM   | 900  | 1 | 0 | 0 |
| 179 | 891  | GAALQIPFAMQMAYR  | 905  | 0 | 0 | 0 |
| 180 | 896  | IPFAMQMAYRFNGIG  | 910  | 0 | 0 | 0 |
| 181 | 901  | QMAYRFNGIGVTQNV  | 915  | 0 | 0 | 0 |
| 182 | 906  | FNGIGVTQNVLYENQ  | 920  | 0 | 0 | 0 |
| 183 | 911  | VTQNVLYENQKLIAN  | 925  | 0 | 0 | 0 |
| 184 | 916  | LYENQKLIANQFNSA  | 930  | 0 | 0 | 0 |
| 185 | 921  | KLIANQFNSAIGKIQ  | 935  | 1 | 0 | 0 |
| 186 | 926  | QFNSAIGKIQDSLSS  | 940  | 0 | 0 | 0 |
| 187 | 931  | IGKIQDSLSSSTASAL | 945  | 0 | 0 | 0 |
| 188 | 936  | DSLSSSTASALGKLQD | 950  | 0 | 1 | 0 |
| 189 | 941  | TASALGKLQDVVNQN  | 955  | 0 | 0 | 0 |
| 190 | 946  | GKLQDVVNQNAQALN  | 960  | 0 | 0 | 0 |
| 191 | 951  | VVNQNAQALNTLVKQ  | 965  | 0 | 0 | 0 |
| 192 | 956  | AQALNTLVKQLSSNF  | 970  | 0 | 0 | 0 |
| 193 | 961  | TLVKQLSSNFGAISS  | 975  | 0 | 0 | 0 |
| 194 | 966  | LSSNFGAISSVLNDI  | 980  | 0 | 0 | 0 |
| 195 | 971  | GAISSVLNDILSRLD  | 985  | 0 | 0 | 0 |
| 196 | 976  | VLNDILSRLDKVEAE  | 990  | 1 | 0 | 0 |
| 197 | 981  | LSRLDKVEAEVQIDR  | 995  | 0 | 0 | 0 |
| 198 | 986  | KVEAEVQIDRLITGR  | 1000 | 0 | 0 | 0 |
| 199 | 991  | VQIDRLITGRQLQSLQ | 1005 | 0 | 0 | 0 |
| 200 | 996  | LITGRQLQSLQTYVTQ | 1010 | 0 | 0 | 0 |
| 201 | 1001 | LQSLQTYVTQQLIRA  | 1015 | 0 | 0 | 0 |
| 202 | 1006 | TYVTQQLIRAAEIRA  | 1020 | 0 | 0 | 0 |
| 203 | 1011 | QLIRAAEIRASANLA  | 1025 | 0 | 0 | 0 |
| 204 | 1016 | AEIRASANLAATKMS  | 1030 | 0 | 0 | 0 |
| 205 | 1021 | SANLAATKMSECVLG  | 1035 | 0 | 0 | 0 |
| 206 | 1026 | ATKMSECVLGQSKRV  | 1040 | 0 | 0 | 0 |
| 207 | 1031 | ECVLGQSKRVDFCGK  | 1045 | 0 | 0 | 0 |
| 208 | 1036 | QSKRVDFCGKGYHLM  | 1050 | 0 | 0 | 0 |
| 209 | 1041 | DFCGKGYHLMSPQS   | 1055 | 0 | 0 | 0 |
| 210 | 1046 | GYHLMSPQSAPHGV   | 1060 | 0 | 0 | 0 |
| 211 | 1051 | SFPQSAPHGVVFLHV  | 1065 | 0 | 0 | 0 |
| 212 | 1056 | APHGVVFLHVTYVPA  | 1070 | 0 | 2 | 0 |
| 213 | 1061 | VFLHVTYVPAQEKNF  | 1075 | 0 | 0 | 0 |
| 214 | 1066 | TYVPAQEKNFTTAPA  | 1080 | 0 | 0 | 0 |
| 215 | 1071 | QEKNFTTAPAICHDG  | 1085 | 0 | 0 | 0 |
| 216 | 1076 | TTAPAICHDGKAHFP  | 1090 | 0 | 0 | 0 |
| 217 | 1081 | ICHDGKAHFPPREGVF | 1095 | 0 | 1 | 0 |

|     |      |                  |      |   |   |   |
|-----|------|------------------|------|---|---|---|
| 218 | 1086 | KAHFPREGVFVSNGT  | 1100 | 0 | 0 | 0 |
| 219 | 1091 | REGVFVSNGTHWFVT  | 1105 | 0 | 0 | 0 |
| 220 | 1096 | VSNNGTHWFVTQRNFY | 1110 | 0 | 0 | 0 |
| 221 | 1101 | HWFVTQRNFYEPQII  | 1115 | 0 | 2 | 0 |
| 222 | 1106 | QRNFYEPQIIITDNT  | 1120 | 1 | 0 | 0 |
| 223 | 1111 | EPQIIITDNTFVSGN  | 1125 | 1 | 0 | 0 |
| 224 | 1116 | TTDNTFVSGNCDVVI  | 1130 | 0 | 3 | 0 |
| 225 | 1121 | FVSGNCDVVIGIVNN  | 1135 | 0 | 0 | 0 |
| 226 | 1126 | CDVVIGIVNNTVYDP  | 1140 | 0 | 2 | 1 |
| 227 | 1131 | GIVNNTVYDPLQPEL  | 1145 | 0 | 2 | 0 |
| 228 | 1136 | TVYDPLQPELDSFKE  | 1150 | 0 | 2 | 0 |
| 229 | 1141 | LQPELDSFKEELDKY  | 1155 | 1 | 3 | 0 |
| 230 | 1146 | DSFKEELDKYFKNHT  | 1160 | 2 | 2 | 1 |
| 231 | 1151 | ELDKYFKNHTSPDVD  | 1165 | 0 | 0 | 0 |
| 232 | 1156 | FKNHTSPDVDLGDIS  | 1170 | 0 | 0 | 0 |
| 233 | 1161 | SPDVDLGDISGINAS  | 1175 | 0 | 0 | 0 |
| 234 | 1166 | LGDISGINASVVNIQ  | 1180 | 0 | 0 | 1 |
| 235 | 1171 | GINASVVNIQKEIDR  | 1185 | 0 | 0 | 0 |
| 236 | 1176 | VVNIQKEIDRLNEVA  | 1190 | 0 | 0 | 0 |
| 237 | 1181 | KEIDRLNEVAKNLNE  | 1195 | 0 | 0 | 0 |
| 238 | 1186 | LNEVAKNLNESLIDL  | 1200 | 0 | 0 | 0 |
| 239 | 1191 | KNLNESLIDLQELGK  | 1205 | 0 | 0 | 0 |
| 240 | 1196 | LNESLIDLQELGKYE  | 1210 | 0 | 0 | 0 |
